# Supplementary material
Source: PubMed Central journal article supplement (PMC8285085)
Supplement: NIHMS1718093-supplement-Supplemental_Items.pdf [file NIHMS1718093-supplement-Supplemental_Items.pdf]

## **APPENDIX**

### **SPECIFICATION OF PRIMARY INTERRUPTED TIME SERIES REGRESSION**

Our primary segmented regression can be described by the following equation:

$$Y = \beta_0 + \beta_1 * time + \beta_2 * time\_since\_interruption + \varepsilon$$

where Y denotes annual CRC screening prevalence; *time* denotes the study year, *time* = {1,2,3,4,5,6,7,8,9}; and *time\_since\_interruption* denotes the number of years since the ACA interruption, *time\_since\_interruption* = {0,1,2,3}.

Coefficient  $\beta_0$  is the constant term (intercept) and estimates the annual screening rate immediately prior to the beginning of the study period (2007). Coefficient  $\beta_1$  represents the baseline linear trend in screening over time during the pre-ACA period. Coefficient  $\beta_2$  represents changes in CRC screening trends post-ACA.

## SENSITIVITY ANALYSIS 1 – INTERRUPTED TIME SERIES REGRESSION WITH LEVEL CHANGE

**Appendix Figure 1.** Segmented trend estimates of annual colorectal cancer screening rates for Hispanic versus non-Hispanic adults aged 50–64 years, 2007–2015 (including jump).

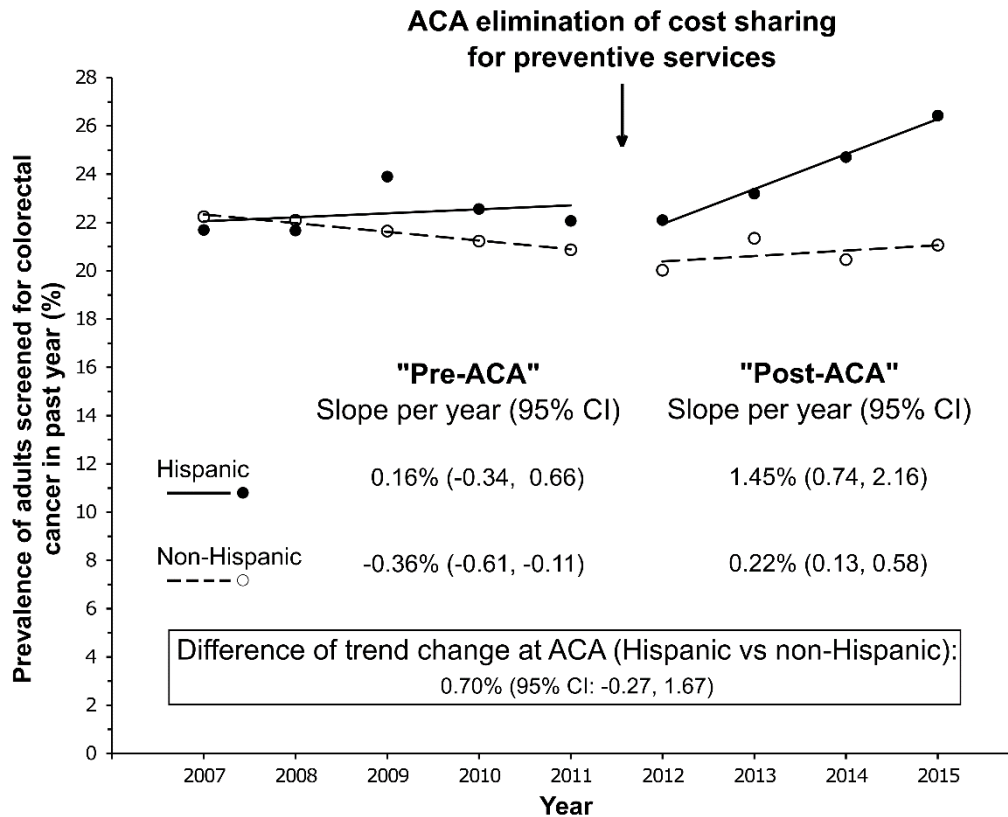

ACA, Affordable Care Act.

**Appendix Table 1.** Segmented Linear Regression Model for Annual Colorectal Cancer Screening Rates for Hispanic versus non-Hispanic Adults Aged 50–64 Years, 2007–2015 (Including Jump)

| Parameter             | Hispanic             | Non-Hispanic         |
|-----------------------|----------------------|----------------------|
|                       | Estimate (95% CI)    | Estimate (95% CI)    |
| Intercept             | 21.89 (20.23, 23.54) | 22.69 (21.85, 23.53) |
| Pre-ACA trend         | 0.16 (-0.34, 0.66)   | -0.36 (-0.61, -0.11) |
| Jump at ACA           | -0.94 (-3.06, 1.18)  | -0.15 (-1.22, 0.93)  |
| Post-ACA trend        | 1.45 (0.74, 2.16)    | 0.22 (0.13, 0.58)    |
| Post-ACA trend change | 1.29 (0.42, 2.15)    | 0.58 (0.15, 1.02)    |

*Notes:* Estimates correspond to the prevalence (%) for the intercept and jump, or the change in prevalence (%) per year.

ACA, Affordable Care Act.

## SENSITIVITY ANALYSIS 2 – INTERRUPTED TIME SERIES REGRESSION EXCLUDING 2011 DATA AND LEVEL CHANGE

**Appendix Table 2.** Segmented Linear Regression Model for Annual Colorectal Cancer Screening Rates for Hispanic Versus non-Hispanic Adults Aged 50–64 Years, 2007–2015 (Without Jump Term in Model and Without 2011 Data)

| Parameter             | Hispanic                       | Non-Hispanic                   |
|-----------------------|--------------------------------|--------------------------------|
|                       | Estimate <sup>a</sup> (95% CI) | Estimate <sup>a</sup> (95% CI) |
| Intercept             | 22.22 (20.69, 23.76)           | 22.76 (22.02, 23.49)           |
| Pre-ACA trend         | 0.03 (–0.37, 0.42)             | –0.39 (–0.58, –0.20)           |
| Post-ACA trend change | 1.23 (0.23, 2.23)              | 0.59 (0.12, 1.07)              |

<sup>a</sup>Estimates correspond to prevalence (%) for intercept or change in prevalence (%) per year.

Difference of trend change at ACA (Hispanic vs non-Hispanic): 0.63% (–0.47%, 1.74%).

ACA, Affordable Care Act.

## SENSITIVITY ANALYSIS 3 – INTERRUPTED TIME SERIES REGRESSION INCLUDING LEVEL CHANGE AND EXCLUDING 2011 DATA

**Appendix Table 3.** Segmented Linear Regression Model for Annual Colorectal Cancer Screening Rates for Hispanic Versus non-Hispanic Adults Aged 50–64 Years, 2007–2015 (Without 2011 Data)

| Parameter             | Hispanic                       | Non-Hispanic                   |
|-----------------------|--------------------------------|--------------------------------|
|                       | Estimate <sup>a</sup> (95% CI) | Estimate <sup>a</sup> (95% CI) |
| Intercept             | 21.25 (19.45, 23.04)           | 22.67 (21.57, 23.76)           |
| Pre-ACA trend         | 0.48 (–0.17, 1.14)             | –0.35 (–0.75, 0.05)            |
| Jump at ACA           | –2.21 (–4.91, 0.49)            | –0.20 (–1.85, 1.45)            |
| Post-ACA trend change | 0.97 (0.04, 1.89)              | 0.57 (0.01, 1.14)              |

<sup>a</sup>Estimates correspond to prevalence (%) for intercept/jump, or change in prevalence (%) per year.

Difference of trend change at ACA (Hispanic vs non-Hispanic): 0.40% (–0.69%, 1.48%).

ACA, Affordable Care Act.

**SENSITIVITY ANALYSIS 4 – INTERRUPTED TIME SERIES REGRESSION USING COMPLETE CASE ANALYSIS TO EXAMINE THE IMPACT OF “DON’T KNOW” OR “REFUSED” FOR SCREENING OUTCOME VARIABLE ON TREND COMPARISONS**

**Appendix Table 4.** Segmented Linear Regression Model for Annual Colorectal Cancer Screening Rates for Hispanic Versus non-Hispanic Adults Aged 50–64 Years, 2007–2015 (Using Complete Case Analysis to Account for Missing Data)

| <b>Parameter</b>      | <b>Hispanic</b>                      | <b>Non-Hispanic</b>                  |
|-----------------------|--------------------------------------|--------------------------------------|
|                       | <b>Estimate<sup>a</sup> (95% CI)</b> | <b>Estimate<sup>a</sup> (95% CI)</b> |
| Intercept             | 22.78 (20.96, 24.60)                 | 23.84 (23.01, 24.67)                 |
| Pre-ACA trend         | 0.36 (–0.08, 0.81)                   | –0.25 (–0.45, –0.04)                 |
| Post-ACA trend        | 1.00 (0.23, 1.78)                    | 0.08 (–0.27, 0.44)                   |
| Post-ACA trend change | 0.64 (–0.46, 1.74)                   | 0.33 (–0.17, 0.83)                   |

<sup>a</sup>Estimates correspond to the prevalence (%) for intercept or change in prevalence (%) per year.

Difference of trend change at ACA (Hispanic vs non-Hispanic): 0.35 (95% CI: –1.10, 1.80).

ACA, Affordable Care Act.
